# Supplementary material for: Recombinant Klotho Protein Ameliorates Myocardial Ischemia/Reperfusion Injury by Attenuating Sterile Inflammation
Source: MDPI journal article supplement (doi:10.3390/biomedicines10040894), 2022-04-13
Supplement: s1 [file s1]

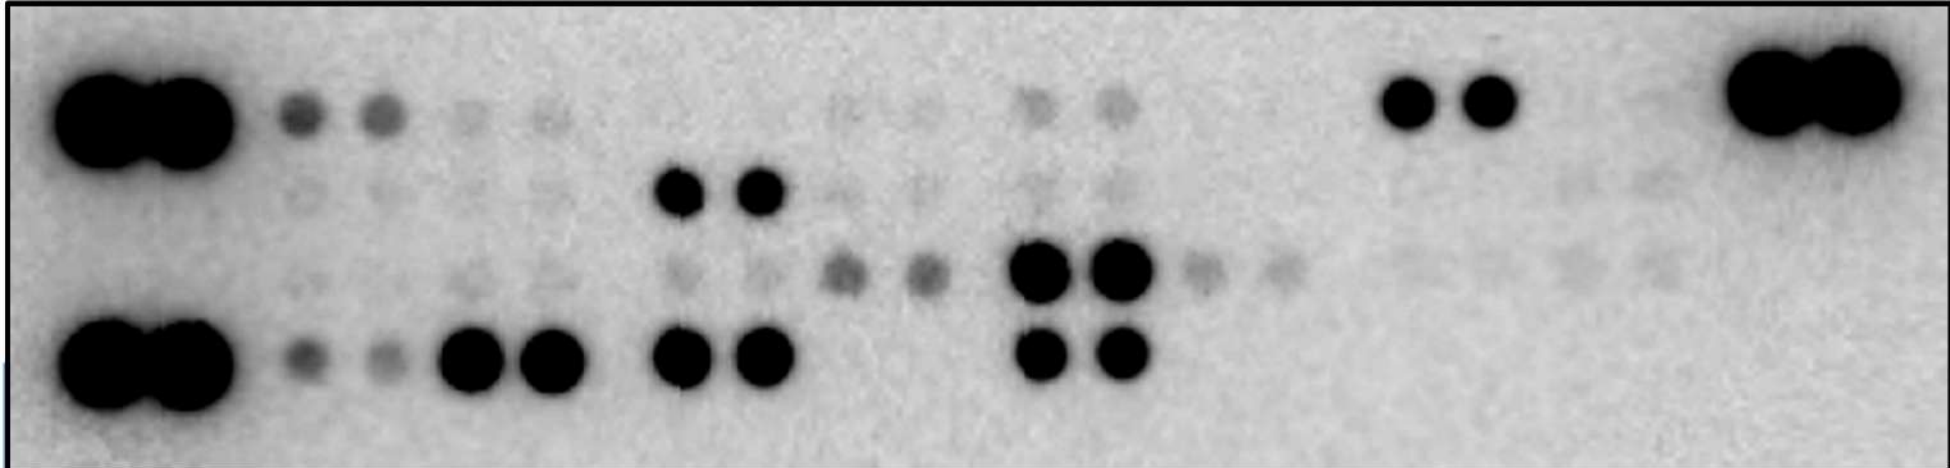

|                 |                   |                             |                |                    |                      |                 |                         |                         |                  |
|-----------------|-------------------|-----------------------------|----------------|--------------------|----------------------|-----------------|-------------------------|-------------------------|------------------|
| Reference spots | A4<br>(CINC-1)    | A4<br>(CINC-1)              | A8<br>(CINC-3) | A10<br>(CNTF)      | A12<br>(Fractalkine) | A14<br>(GM-CSF) | A16<br>(sICAM-1)        | A18<br>(IFN-<br>gamma)  | Reference spots  |
|                 | B4<br>(IL-1alpha) | B6<br>(IL-1beta)            | B8<br>(IL-1ra) | B10<br>(IL-2)      | B12<br>(IL-3)        | B14<br>(IL-4)   | B16<br>(IL-6)           | B18<br>(IL-10)          |                  |
|                 | C4<br>(IL-13)     | C6<br>(IL-17)               | C8<br>(IP-10)  | C10<br>(LIX)       | C12<br>(L-Selectin)  | C14<br>(MIG)    | C16<br>(MIP-<br>1alpha) | C18<br>(MIP-<br>3alpha) |                  |
| Reference spots | D4<br>(RANTES)    | D6<br>(Thymus<br>Chemokine) | D8<br>(TIMP-1) | D10<br>(TNF-alpha) | D12<br>(VEGF)        |                 |                         |                         | Negative control |
