# Supplementary material for: Recombinant Klotho Protein Ameliorates Myocardial Ischemia/Reperfusion Injury by Attenuating Sterile Inflammation
Source: MDPI journal article supplement (doi:10.3390/biomedicines10040894), 2022-04-13
Supplement: s1 [file s1]

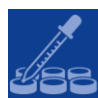Table S1. Number (*n*) of Animals in the Present Study

| Number ( <i>n</i> ) of Animals                                             | Sham | Sham + Klotho | MI | MI + Klotho |
|----------------------------------------------------------------------------|------|---------------|----|-------------|
| 2,3,5-triphenyltetrazolium chloride (TTC) at 4 h after I/R injury in Fig 1 | 5    | 5             | 5  | 5           |
| Representative immunohistochemistry of HMGB1 in Fig 3                      |      |               |    |             |
| High mobility group box-1 (HMGB1) in plasma in Fig 3                       |      |               |    |             |
| 2,3,5-TTC at 24 h after I/R injury in Fig 1                                | -    | -             | 5  | 5           |
| Intracellular reactive oxygen species (ROS) level in Fig 2                 | 5    | 5             | 5  | 5           |
| Inflammatory cytokine expression in Fig 4                                  |      |               |    |             |
| TUNEL assay in Fig 5                                                       | 5    | 5             | 5  | 5           |
| cTnT in plasma in Fig 3                                                    |      |               |    |             |
| Cytokine array analysis at 24 h in Fig 6                                   | 5    | 5             | 5  | 5           |
| Total ( <i>n</i> = 90)                                                     | 20   | 20            | 25 | 25          |

Terminal deoxynucleotidyl transferase (TdT)-mediated dUTP nick end labeling (TUNEL) assay.

| Number ( <i>n</i> ) of Animals                                                                            | MI without rKL ( <i>n</i> ) | MI+ 0.025 µg of rKL/g of Body Mass ( <i>n</i> ) | MI + 0.05 µg of rKL/g of Body Mass ( <i>n</i> ) | MI + 0.075 µg of rKL/g of Body Mass ( <i>n</i> ) |
|-----------------------------------------------------------------------------------------------------------|-----------------------------|-------------------------------------------------|-------------------------------------------------|--------------------------------------------------|
| For determination of the optimal dose of rKL for myocardial protection, 2,3,5-TTC at 4 h after I/R injury | 3                           | 3                                               | 3                                               | 3                                                |
| Total ( <i>n</i> = 12)                                                                                    | 3                           | 3                                               | 3                                               | 3                                                |

Table S2. The Statistical Results for the Optimal Dose of Recombinant Klotho

| 2,3,5-Triphenyltetrazolium Chloride (TTC) (%), Mean ± Standard Deviation (SD) |                                          |                                        |                                         |                 | Overall     | Post Hoc Analysis <i>p</i> -Value |             |             |             |             |  |
|-------------------------------------------------------------------------------|------------------------------------------|----------------------------------------|-----------------------------------------|-----------------|-------------|-----------------------------------|-------------|-------------|-------------|-------------|--|
| MI (1) ( <i>n</i> = 3)                                                        | MI + Klotho 0.025 µg (2) ( <i>n</i> = 3) | MI+ Klotho 0.05 µg (3) ( <i>n</i> = 3) | MI+ Klotho 0.075 µg (4) ( <i>n</i> = 3) | <i>p</i> -Value | (1) vs. (2) | (1) vs. (3)                       | (1) vs. (4) | (2) vs. (3) | (2) vs. (4) | (3) vs. (4) |  |
| 20.57 ± 3.23                                                                  | 11.3 ± 0.05                              | 5.97 ± 3.42                            | 3.71 ± 0.78                             | 0.001           | 0.011       | 0.001                             | 0.001       | 0.027       | 0.032       | 0.730       |  |

MI, myocardial infarction.

Table S3. The Statistical Results of the Present Study

|                                                                                                        | Mean ± Standard Deviation (SD) |                                      |                           |                                    | Overall<br><i>p</i> -Value | Post Hoc Analysis <i>p</i> -Value |             |             |             |             |             |
|--------------------------------------------------------------------------------------------------------|--------------------------------|--------------------------------------|---------------------------|------------------------------------|----------------------------|-----------------------------------|-------------|-------------|-------------|-------------|-------------|
|                                                                                                        | Sham (1)<br>( <i>n</i> = 5)    | Sham + Klotho (2)<br>( <i>n</i> = 5) | MI (3)<br>( <i>n</i> = 5) | MI + Klotho (4)<br>( <i>n</i> = 5) |                            | (1) vs. (2)                       | (1) vs. (3) | (1) vs. (4) | (2) vs. (3) | (2) vs. (4) | (3) vs. (4) |
| 2,3,5-triphenyltetrazo-lium chloride (TTC)(%)                                                          |                                |                                      |                           |                                    |                            |                                   |             |             |             |             |             |
| 4 h TTC (%)                                                                                            | 0.0                            | 0.0                                  | 15.72 ± 1.65              | 5.18 ± 1.40                        | <0.001                     | 1.000                             | <0.001      | <0.001      | <0.001      | <0.001      | <0.001      |
| 24h TTC (%)                                                                                            |                                |                                      | 16.38 ± 6.93              | 5.22 ± 1.53                        | 0.014                      |                                   |             |             |             |             |             |
| Reactive oxygen species level (%)                                                                      |                                |                                      |                           |                                    |                            |                                   |             |             |             |             |             |
|                                                                                                        | 0.35 ± 0.23                    | 0.04 ± 0.07                          | 40.70 ± 8.59              | 8.98 ± 6.84                        | <0.001                     | 1.000                             | <0.001      | 0.246       | <0.001      | 0.211       | <0.001      |
| High mobility group box-1 (HMGB1) colonization (%)                                                     |                                |                                      |                           |                                    |                            |                                   |             |             |             |             |             |
|                                                                                                        | 92.62 ± 2.02                   | 92.25 ± 1.72                         | 18.25 ± 15.04             | 79.45 ± 5.68                       | <0.001                     | 1.000                             | <0.001      | 0.217       | <0.001      | 0.246       | <0.001      |
| HMGB1 Enzyme-linked immunosorbent assay (ELISA) (pg/mL)                                                |                                |                                      |                           |                                    |                            |                                   |             |             |             |             |             |
|                                                                                                        | 35.43 ± 3.78                   | 44.11 ± 7.31                         | 104.06 ± 32.18            | 34.34 ± 10.98                      | <0.001                     | 1.000                             | 0.001       | 1.000       | 0.003       | 1.000       | 0.001       |
| Cardiac troponin (cTnT) ELISA in plasma (ng/mL)                                                        |                                |                                      |                           |                                    |                            |                                   |             |             |             |             |             |
|                                                                                                        | 0.37 ± 0.19                    | 0.70 ± 0.20                          | 3.78 ± 0.99               | 1.33 ± 0.09                        | <0.001                     | 1.000                             | <0.001      | 0.110       | <0.001      | 0.633       | <0.001      |
| Quantification of the expression of inflammatory cytokines                                             |                                |                                      |                           |                                    |                            |                                   |             |             |             |             |             |
| TNF-α                                                                                                  | 2.41 ± 0.69                    | 2.28 ± 0.73                          | 18.71 ± 12.28             | 4.60 ± 0.50                        | 0.004                      | 1.000                             | 0.011       | 1.000       | 0.010       | 1.000       | 0.031       |
| IL-1β                                                                                                  | 1.61 ± 0.29                    | 2.69 ± 0.81                          | 73.32 ± 25.21             | 23.39 ± 3.44                       | <0.001                     | 1.000                             | <0.001      | 0.167       | <0.001      | 0.212       | <0.001      |
| IL-6                                                                                                   | 2.17 ± 0.75                    | 4.27 ± 1.63                          | 3986.57 ± 3176.19         | 550.19 ± 193.98                    | 0.007                      | 1.000                             | 0.016       | 1.000       | 0.016       | 1.000       | 0.045       |
| Terminal deoxynucleotidyl transferase (TdT)-mediated dUTP nick end labeling (TUNEL) assay ( <i>n</i> ) |                                |                                      |                           |                                    |                            |                                   |             |             |             |             |             |
|                                                                                                        | 1 ± 0.63                       | 1 ± 0.0                              | 93.53 ± 21.86             | 34.13 ± 9.13                       | <0.001                     | 1.000                             | <0.001      | <0.001      | <0.001      | <0.001      | <0.001      |
| Proteome Profiler array for cytokines                                                                  |                                |                                      |                           |                                    |                            |                                   |             |             |             |             |             |
| CINC-1                                                                                                 | 12,260.21 ± 2186.33            | 13,841.58 ± 1341.43                  | 25,498.34 ± 1374.20       | 15,100.64 ± 1974.13                | <0.001                     | 1.000                             | <0.001      | 0.869       | 0.001       | 1.000       | 0.002       |
| sICAM-1                                                                                                | 25,137.56 ± 2039.55            | 20,804.38 ± 2429.81                  | 41,183.05 ± 4705.14       | 26,346.87 ± 3858.54                | 0.002                      | 1.000                             | 0.010       | 1.000       | 0.002       | 0.869       | 0.015       |
| LIX                                                                                                    | 11,337.85 ± 1226.16            | 12,200.12 ± 1239.62                  | 20,287.01 ± 3009.43       | 13,248.30 ± 1668.39                | 0.006                      | 1.000                             | 0.010       | 1.000       | 0.018       | 1.000       | 0.039       |
| L-Selectin                                                                                             | 17,683.36 ± 2987.18            | 19,458.25 ± 2229.08                  | 51,362.90 ± 3984.12       | 31,617.62 ± 3600.89                | <0.001                     | 1.000                             | <0.001      | 0.016       | <0.001      | 0.035       | 0.002       |

MI, myocardial infarction; TNF, tumor necrosis factor; IL, interleukine; CINC-1, Cytokine-induced neutrophil chemoattractant 1; sICAM-1/CD54, soluble intracellular adhesion molecule-1; LIX, Chemokine (C-X-C motif) ligand 5 (CXCL5).
